# Supplementary material for: Recovery of Green Polyols from Rigid Polyurethane Waste by Catalytic Depolymerization
Source: MDPI journal article supplement (doi:10.3390/polym14142936), 2022-07-20
Supplement: s1 [file s1]

# Supporting information

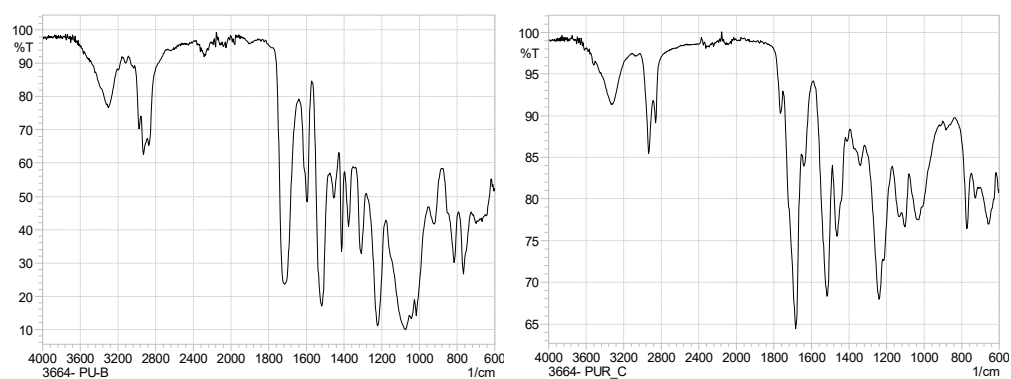

Figure S1. Spectra obtained by ATR-FTIR spectroscopy of RPUF-B (left) and RPUF-C (right) residues.

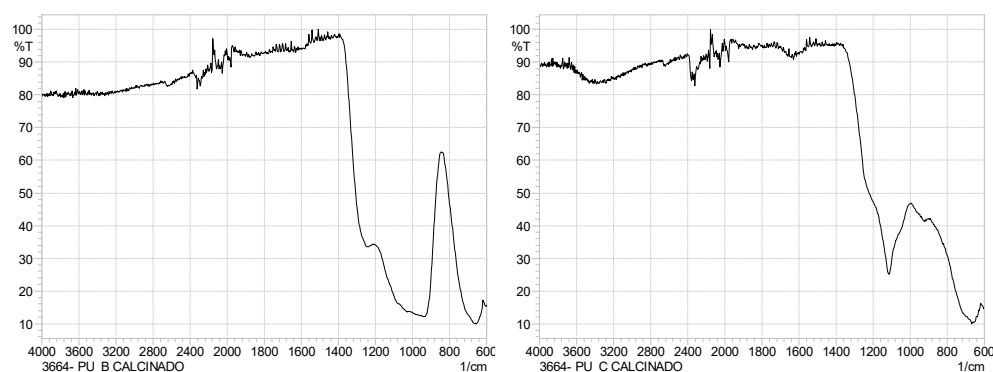

Figure S2. Spectra obtained by ATR-FTIR spectroscopy of the ashes resulting from the calcination of RPUF residues. RPUF-B (left) and RPUF-C (right).

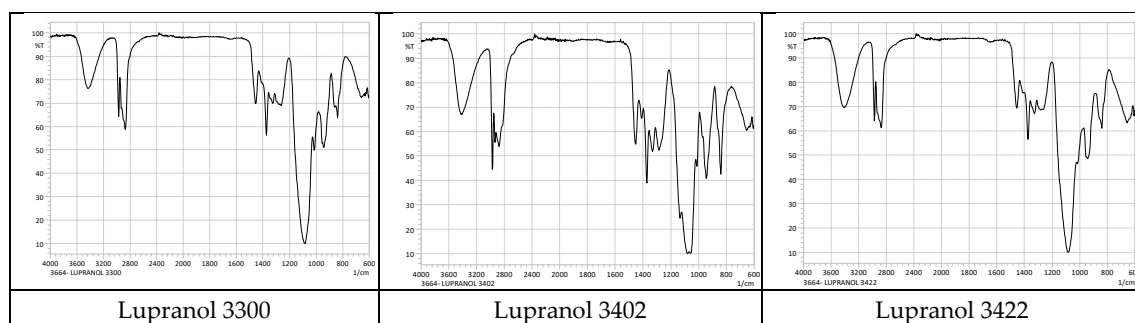

Figure S3. ATR-IR spectrum of commercial reference polyols.

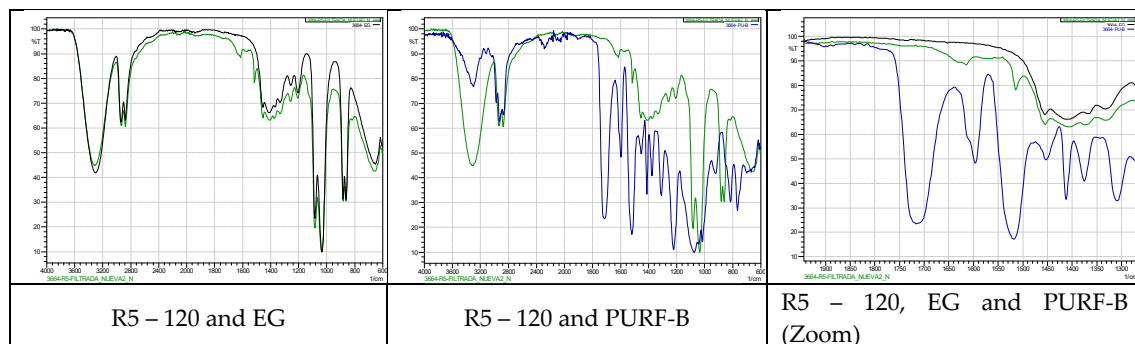

Figure S4. ATR-IR spectrum of Reaction 5 (green) compared with EG (black) and PURF-B (blue).

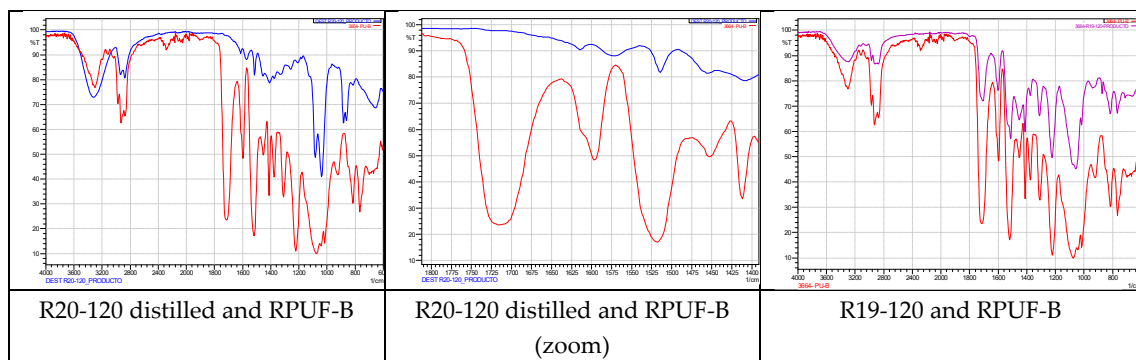

Figure S5. ATR-IR spectrums of the products of Reactions 20 and 19 compared with and RPUF-B (red).

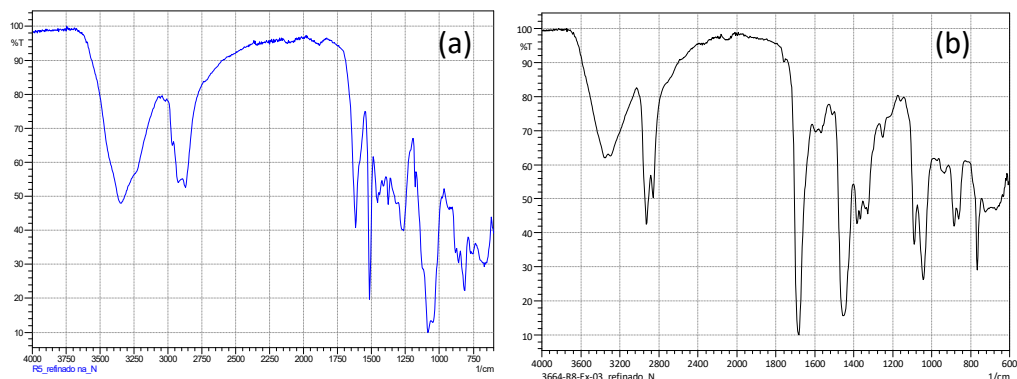

Figure S6. IR spectra of the refined products of the reactions R5 and R8 at  $200^{\circ}\text{C}$ , 2h, PUR/solvent ratio = 1/4, and NaOH (0.002 mol/g): (a) R5, PURF-B and (b) R8, PURF-C.

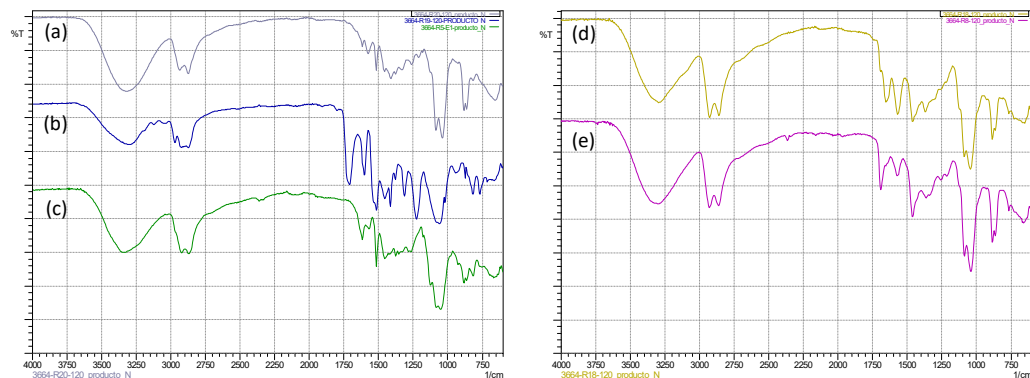

Figure S7. IR spectra of the reactions at  $200^{\circ}\text{C}$ , 2h and PUR/solvent ratio = 1/4, after removal of the EG by distillation: RPUF-B (a) with Na acetate (0.002 mol/g), (b) without catalyst, (c) with NaOH (0.002 mol/g); RPUF-C (d) with Na acetate (0.002 mol/g) and (e) with NaOH (0.002 mol/g).

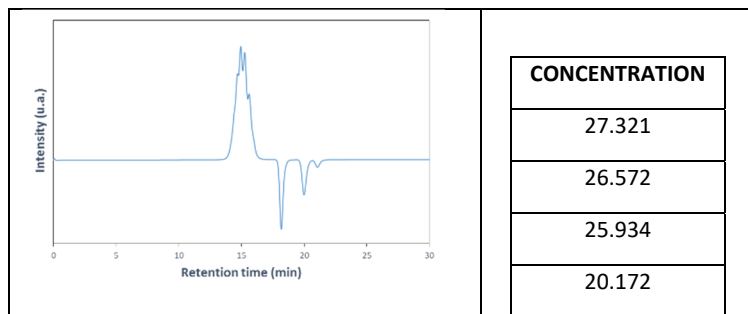

Figure S8. GPC of Lupranol 3300, one of the polyols used in PURF-B parts and its components concentration.

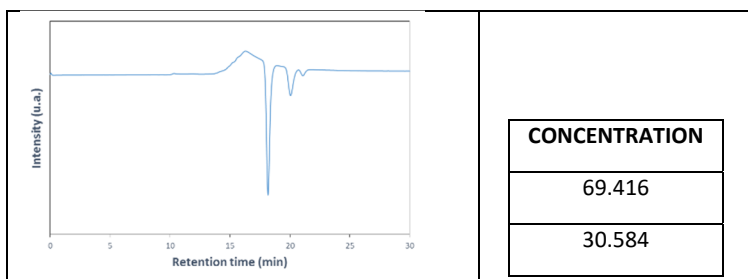

Figure S9. GPC of Lupranol 3402, one of the polyols used in PURF-B parts and its components concentration

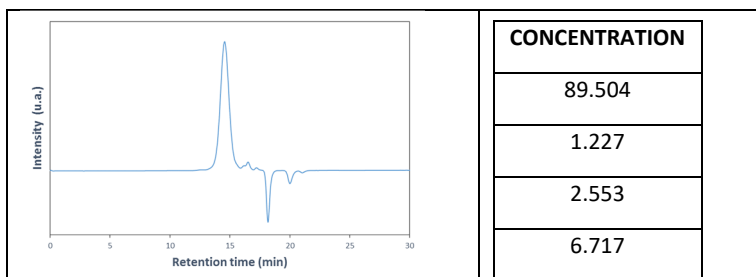

Figure S10. GPC of Lupranol 3422, one of the polyols used in PURF-B parts and its components concentration

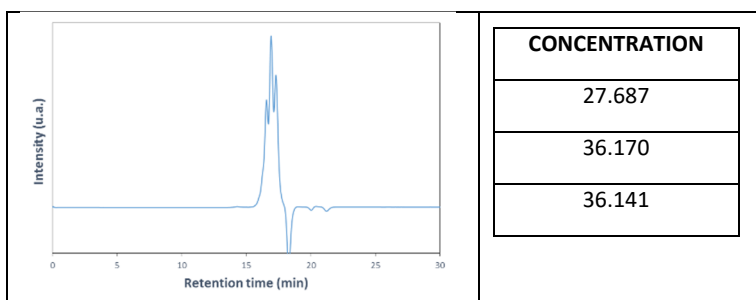

Figure S11. GPC of Lupranol 3505-1, polyol used in PURF-C parts and its components concentration

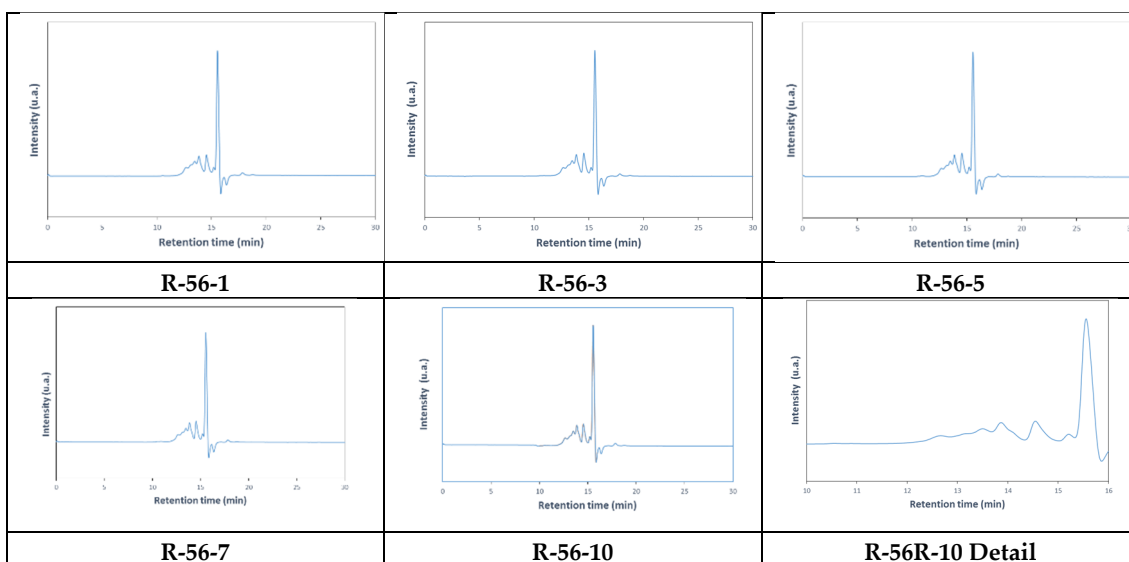

Figure S12. GPC of reaction 56, min 1, 3, 5, 7 and 10.

| Chemical product                                                         | mg/Kg sample | %           |
|--------------------------------------------------------------------------|--------------|-------------|--------------|-------------|--------------|-------------|--------------|-------------|
| Furan, tetrahydro-2-methyl-                                              | 3996,172648  | 0,399617265 | 4048,250023  | 0,404825002 | 4009,571885  | 0,400957189 | 4180,405934  | 0,418040593 |
| Peroxide, dipropyl                                                       | 79391,58525  | 7,939158525 | 58581,83635  | 5,858183635 | 59568,40671  | 5,956840671 | 87345,41346  | 8,734541346 |
| 2-Furanol, tetrahydro-                                                   | 140616,5221  | 14,06165221 | 128928,7775  | 12,89287775 | 120093,2261  | 12,00932261 | 138877,9914  | 13,88779914 |
| 1,3-Propanediol                                                          | 1894,437303  | 0,18944373  | 1090,622085  | 0,109062209 | 1642,697729  | 0,164269773 | 2428,196503  | 0,24281965  |
| Butanoic acid, 4-hydroxy-                                                | 47219,85388  | 4,721985388 | 26544,07706  | 2,654407706 | 23861,83002  | 2,386183002 | 27402,23655  | 2,740223655 |
| Furan, tetrahydro-2-methyl-                                              | 0            | 0           | 23303,82875  | 2,330382875 | 28932,56526  | 2,893256526 | 38156,34828  | 3,815634828 |
| 1,3-Propanediol, 2-ethyl-2-(hydroxymethyl)-                              | 1183,798888  | 0,118379889 | 4420,287197  | 0,44202872  | 3464,91991   | 0,346491991 | 3690,213684  | 0,369021368 |
| <b>3-Amino-4,5,6,7,8,9-hexahydrocyclooct(c)isoxazole</b>                 |              |             |              |             |              |             | 763,5831038  | 0,07635831  |
| <b>Pyrrolizine-7-methanol, 2,3,5,7a-tetrahydro-1-hydroxy-, (1S-cis)-</b> |              |             |              |             |              |             | 30,0198052   | 0,003001981 |
| 1,3-Propanediol, 2-ethyl-2-(hydroxymethyl)-                              | 514,4212085  | 0,051442121 | 5089,753363  | 0,508975336 | 10126,51682  | 1,012651682 | 2341,890758  | 0,234189076 |
| Cyclopropanetetradecanoic acid, 2-octyl-, methyl ester                   |              |             | 0            | 0           | 979,8361515  | 0,097983615 | 11966,40967  | 1,196640967 |
| Octaethylene glycol monododecyl ether                                    |              |             | 0            | 0           | 968,7880511  | 0,096878805 | 1239,990102  | 0,12399901  |
| <b>1H-Pyrrole, 1-butyl-</b>                                              |              |             | 1054,248391  | 0,105424839 | 3988,857385  | 0,398885738 | 1190,305435  | 0,119030544 |
| Hexanedioic acid, bis(2-ethylhexyl) ester                                |              |             | 0            | 0           | 0            | 0           | 7127,106069  | 0,712710607 |
|                                                                          | 274816,7913  | 27,48167913 | 253061,6807  | 25,30616807 | 257637,216   | 25,7637216  | 326740,1107  | 32,67401107 |

Figure S13. Screening (GPC) of polyols with the residue RPUF-C at 500 microns

|                                                        | 30 min       |             | 60 min       |             | 90 min       |             | 120 min      |             |
|--------------------------------------------------------|--------------|-------------|--------------|-------------|--------------|-------------|--------------|-------------|
| Chemical product                                       | mg/Kg sample | %           |
| Furan, tetrahydro-2-methyl-                            | 6947,569339  | 0,694756934 | 7050,718717  | 0,705071872 | 7106,461941  | 0,710646194 | 4587,935227  | 0,458793523 |
| Peroxide, dipropyl                                     | 64867,64566  | 6,486764566 | 73528,27035  | 7,352827035 | 68579,17733  | 6,857917733 | 65360,54688  | 6,536054688 |
| 2-Furanol, tetrahydro-                                 | 106551,0563  | 10,65510563 | 124006,6168  | 12,40066168 | 116844,5741  | 11,68445741 | 87332,14442  | 8,733214442 |
| 2-Furanol, tetrahydro-                                 |              |             |              |             |              |             | 60950,04746  | 6,095004746 |
| 2-Furanol, tetrahydro-                                 | 245063,6248  | 24,50636248 | 198977,019   | 19,8977019  | 198846,933   | 19,8846933  | 27079,0621   | 2,70790621  |
| 1,3-Propanediol                                        | 8047,359881  | 0,804735988 | 7482,117292  | 0,748211729 | 8112,027929  | 0,811202793 | 2777,037268  | 0,277703727 |
| Butyrolactone                                          | 122089,687   | 12,2089687  | 105135,5173  | 10,51355173 | 105881,8447  | 10,58818447 | 0            | 0           |
| Furan, tetrahydro-2-methyl-                            | 56790,32907  | 5,679032907 | 85024,78021  | 8,502478021 | 124277,2049  | 12,42772049 | 99586,89143  | 9,958689143 |
| 1,3-Propanediol, 2-ethyl-2-(hydroxymethyl)-            | 1567,762112  | 0,156776211 | 1909,118294  | 0,190911829 | 4221,427035  | 0,422142703 | 3227,514786  | 0,322751479 |
| 1,3-Propanediol, 2-ethyl-2-(hydroxymethyl)-            |              |             | 3629,914692  | 0,362991469 | 7095,149585  | 0,709514959 | 10699,19631  | 1,069919631 |
| Cyclopropanetetradecanoic acid, 2-octyl-, methyl ester |              |             |              |             |              |             | 357,5480273  | 0,035754803 |
| Octaethylene glycol monododecyl ether                  |              |             |              |             |              |             | 710,1276505  | 0,071012765 |
| <b>1H-Pyrrole, 1-butyl-</b>                            |              |             |              |             |              |             | 2374,220203  | 0,23742202  |
|                                                        | 611925,0341  | 61,19250341 | 606744,0727  | 60,67440727 | 640964,8004  | 64,09648004 | 350901,1796  | 35,09011796 |

Figure S14. Screening (GPC) of polyols with the residue RPUF-C at 2 mm

|                                                           | 30 min       |             | 60 min       |             | 90 min       |             | 120 min      |             |
|-----------------------------------------------------------|--------------|-------------|--------------|-------------|--------------|-------------|--------------|-------------|
| Chemical product                                          | mg/Kg sample | %           |
| Furan, tetrahydro-2-methyl-                               | 3175,150577  | 0,317515058 | 2844,901109  | 0,284490111 | 3373,524697  | 0,33735247  | 2360,116965  | 0,236011696 |
| Peroxide, dipropyl                                        | 59250,70032  | 5,925070032 | 101718,0511  | 10,17180511 | 55579,87916  | 5,557987916 | 66912,35186  | 6,691235186 |
| Toluene                                                   | 9460,265751  | 0,946026575 | 0            | 0           | 0            | 0           | 0            | 0           |
| 2-Furanol, tetrahydro-                                    | 104575,4285  | 10,45754285 | 114942,5579  | 11,49425579 | 98274,33565  | 9,827433565 | 98095,76493  | 9,809576493 |
| 1,3-Propanediol                                           | 104,8407983  | 0,01048408  | 0            | 0           | 0            | 0           | 0            | 0           |
| Butanoic acid, 4-hydroxy-                                 | 11389,13446  | 1,138913446 | 10994,6978   | 1,09946978  | 9621,739728  | 0,962173973 | 10373,26248  | 1,037326248 |
| Furan, tetrahydro-2-methyl-                               | 21829,67221  | 2,182967221 | 25142,75111  | 2,514275111 | 21294,75696  | 2,129475696 | 23303,00791  | 2,330300791 |
| 1,3-Propanediol, 2-ethyl-2-(hydroxymethyl)-               | 7983,554621  | 0,798355462 | 6929,695152  | 0,692969515 | 8800,993015  | 0,880099301 | 4235,142966  | 0,423514297 |
| 1,3-Propanediol, 2-ethyl-2-(hydroxymethyl)-               | 9645,658904  | 0,96456589  | 6641,483922  | 0,664148392 | 14674,9614   | 1,46749614  | 18760,63495  | 1,876063495 |
| Cyclopropanetetradecanoic acid, 2-octyl-, methyl ester    |              | 0           |              | 0           | 1679,301084  | 0,167930108 | 2332,652654  | 0,233265265 |
| Octaethylene glycol monododecyl ether                     | 821,8464656  | 0,082184647 | 290,3104066  | 0,029031041 | 1815,623209  | 0,181562321 | 3159,153696  | 0,31591537  |
| <b>1H-Pyrrole, 1-butyl-</b>                               |              | 0           | 0            | 0           | 0            | 0           | 0            | 0           |
| Hexanedioic acid, bis(2-ethylhexyl) ester                 | 0            | 0           | 0            | 0           |              |             | 2682,643393  | 0,268264339 |
| Phenol, 2,2'-methylenebis[6-(1,1-dimethylethyl)-4-methyl- | 0            | 0           | 601,5494312  | 0,060154943 | 0            | 0           | 0            | 0           |
| Bis(2-ethylhexyl) phthalate                               | 0            | 0           | 6517,296736  | 0,651729674 | 12430,07922  | 1,243007922 | 73235,55049  | 7,323555049 |
|                                                           | 228236,2526  | 22,82362526 | 276623,2947  | 27,66232947 | 227545,1941  | 22,75451941 | 305450,2823  | 30,54502823 |

Figure S15. Screening (GPC) of polyols with the residue RPUF-C at 5 mm

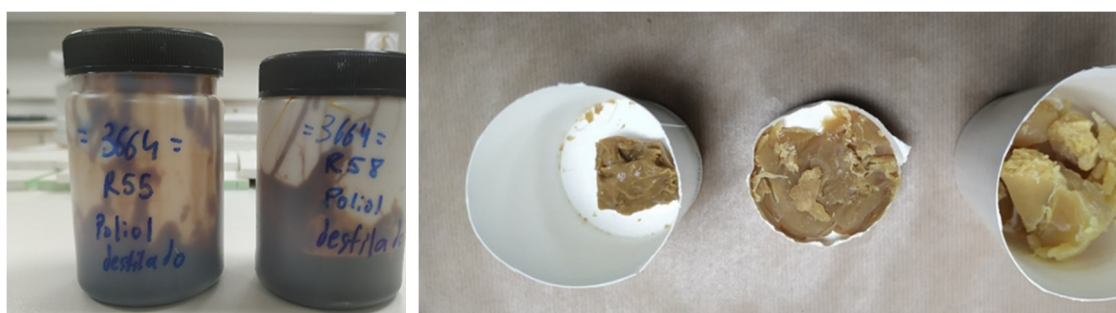

Figure S16. Images of GP-B (left) and GP-C obtained with the initial waste at 500 microns, 5 mm and 2 mm (right)

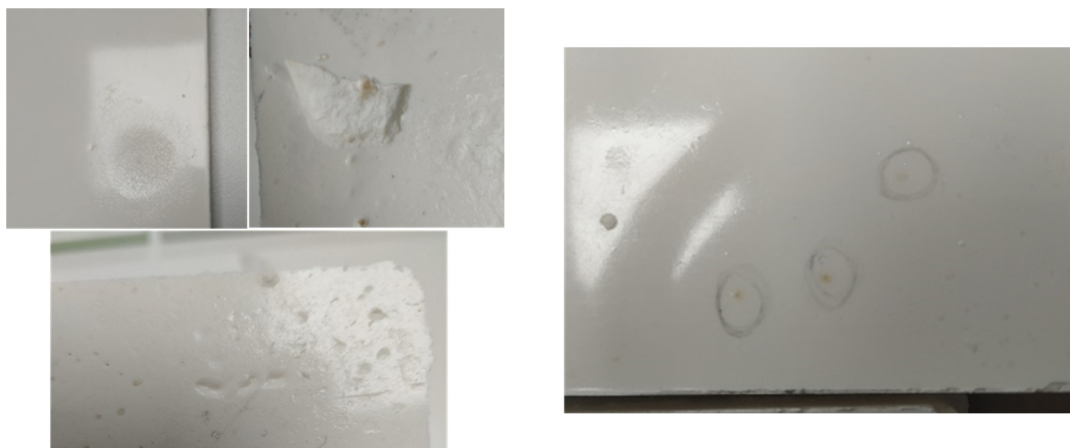

Figure S17. Some defects found in plates of GP-B at 10% (left) and GP-C at 5% (right)

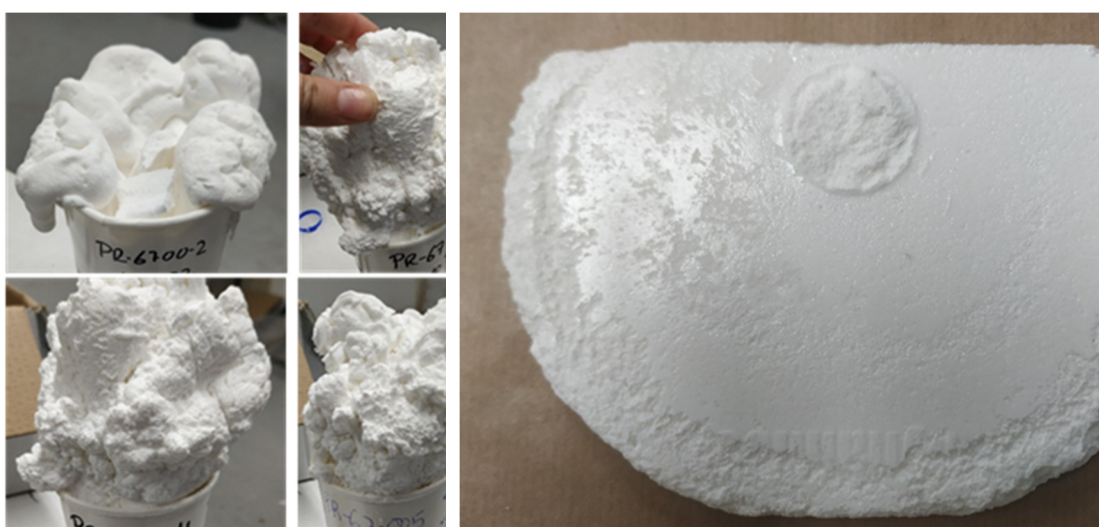

Figure S18. Free foaming for ref. 3 (up left), ref. 4 (up right), ref. 5 (down left) and ref. 6 (down right). Plate for ref. 3 (right)

**Table S1.** Conditions of the glycolysis reactions RPUF-C.

| Glycolysis Reaction Code | Particle size [mm]. | Solvent | Solvent:PU [g:g]. | Temperature [°C] | Catalyst   | Catalyst :PU [mol:g] | Time [h] | Conversion (%) g reacted /g PURF |
|--------------------------|---------------------|---------|-------------------|------------------|------------|----------------------|----------|----------------------------------|
| R8                       | 2                   | E.G.    | 4:1               | 198              | NaOH       | 0.002                | 2        | 48                               |
| R9                       | 2                   | D.E.G.  | 4:1               | 200              | NaOH       | 0.002                | 2        | 0                                |
| R13                      | 2                   | E.G.    | 4:1               | 198              | NaOH       | 0.001                | 2        | 64                               |
| R15                      | 2                   | E.G.    | 4:1               | 198              | -          | 0.002                | 2        | 47                               |
| R18                      | 2                   | E.G.    | 4:1               | 198              | Na Acetate | -                    | 2        | 69                               |
| R24                      | 2                   | E.G.    | 4:1               | 180              | NaOH       | 0.002                | 2        | 0                                |
| R25                      | 2                   | E.G.    | 2:1               | 198              | NaOH       | 0.002                | 2        | 0                                |
| R27                      | 2                   | E.G.    | 4:1               | 180              | Na Acetate | 0.002                | 2        | 0                                |
| R34                      | 2                   | E.G.    | 4:1               | 198              | DEA        | 0.002                | 2        | 38                               |
| R36                      | 2                   | E.G.    | 4:1               | 198              | NaOH       | 0.002                | 2        | 63                               |
| R40                      | 2                   | E.G.    | 4:1               | 198              | NaOH       | 0.002                | 2        | 53                               |
| R41                      | 5                   | E.G.    | 4:1               | 198              | Na Acetate | 0.002                | 5        | 77                               |
| R45                      | 2                   | E.G.    | 4:1               | 198              | NaOH       | 0.002                | 2        | 100                              |
| R48                      | 2                   | E.G.    | 4:1               | 198              | NaOH       | 0.002                | 2        | 94                               |

|     |   |      |     |     |      |       |   |    |
|-----|---|------|-----|-----|------|-------|---|----|
| R49 | 5 | E.G. | 4:1 | 198 | NaOH | 0.002 | 2 | 90 |
|-----|---|------|-----|-----|------|-------|---|----|

**Table S2.** Inorganic matter content after muffle calcination of the wastes.

| Waste type            | RPUF-B | RPUF-C |
|-----------------------|--------|--------|
| Inorganic fillers (%) | 1.2    | 9.3    |
| Standard deviation    | 0.0    | 0.0    |

**Table S3.** TG and dTG curves of the residues RPUF-B and RPUF-C.

| Waste Type | Degradation range [°C] | Solid residue [°C] | Maximum degradation T [°C] | Glass transition T [°C] |
|------------|------------------------|--------------------|----------------------------|-------------------------|
| RPUF-B     | 250-540                | 14.8               | 349                        | 78                      |
| RPUF-C     | 250-490                | 11.4               | 393                        | 66                      |

**Table S4.** Percentage by weight of elements present in RPUF residues analyzed by XRF.

| Element/ % Weight                                                                      | RPUF-B | RPUF-C |
|----------------------------------------------------------------------------------------|--------|--------|
| Ag, As, Au, Bi, Br, Ca, Cd, Cl, Co, Cr, Cu, Fe, Hg, Mn, Mo, Ni, Pb, Sb, Se, Sr, Zn, Zr | 0.0    | 0.0    |
| Ba                                                                                     | 0.0    | 0.1    |
| Sn                                                                                     | 0.0    | 0.1    |
| Ti                                                                                     | 0.4    | 1.3    |
| Total                                                                                  | 0.4    | 1.5    |
| Standard Deviation (%)                                                                 | 0.0    | 0.3    |

**Table S5.** Results of the quantity of polyols obtained in each of the glycolysis reactions for 500 microns, 2 mm and 5 mm RPUF-C waste

|               | Glycolysis reaction time |         |         |
|---------------|--------------------------|---------|---------|
| RPUF-C wasted | 60 min                   | 90 min  | 120 min |
| 500 microns   | 60,51 g                  | 67,51 g | 75,53 g |
| 2 mm          | 43,52 g                  | 62,73 g | 42,36 g |
| 5 mm          | 25,34 g                  | 68,14 g | 65,35 g |

**Table S6.** Hydroxyl number of the polyols obtained

| Polyols             | Hydroxyl number (mgKOH/g) |
|---------------------|---------------------------|
| 500 microns/90 min  | 632                       |
| 500 microns/120 min | 682                       |
| 2mm/90min           | 815                       |
| 2mm/120 min         | 929                       |

| Polyols       | Hydroxyl number (mgKOH/g) |
|---------------|---------------------------|
| 5 mm/ 5 min   | 764                       |
| 5 mm/ 30 min  | Insoluble, no measure     |
| 5 mm/ 60 min  |                           |
| 5 mm/ 90 min  | 673                       |
| 5 mm/ 120 min | 821                       |

**Table S7.** Formulations with recycled paste.

| Reference sample | Recycled paste in the total formulation | Polyol for RPUF-C | Catalyst | Espumation time (s) |
|------------------|-----------------------------------------|-------------------|----------|---------------------|
| 1                | 0%                                      | 100%              | 0,16%    | 60s                 |
| 2                | 5,0%                                    | 95,0%             | 0,00%    | No activación       |
| 3                | 5,0%                                    | 95,0%             | 0,16%    | 100s                |
| 4                | 5,0%                                    | 95,0%             | 0,32%    | 41s                 |
| 5                | 10,0%                                   | 90,0%             | 0,16%    | 45s                 |

|   |       |       |       |     |
|---|-------|-------|-------|-----|
| 6 | 15,0% | 85,0% | 0,16% | 42s |
| 7 | 30,0% | 70,0% | 0,16% | 0s  |
